# Supplementary material for: Stable gold nanoparticles as a novel peroxidase mimic for colorimetric detection of cysteine
Source: Royal Society of Chemistry journal article supplement (doi:10.1039/c6ay00367b), 2016-01-01
Supplement: c6ay00367b1.pdf [file c6ay00367b1.pdf]

## SUPPORTING INFORMATION

*for*

### **Stable gold nanoparticles as a novel peroxidase mimic for colorimetric detection of cysteine**

**Rong Sheng Li,<sup>a</sup> Hai Liu,<sup>a</sup> Bin Bin Chen,<sup>b</sup> Hong Zhi Zhang,<sup>a</sup> Cheng Zhi Huang<sup>\*,a, b</sup> and  
Jian Wang <sup>\*,a,c</sup>**

<sup>a</sup> *Key Laboratory of Luminescent and Real-Time Analytical Chemistry (Southwest University) Ministry of Education, College of Pharmaceutical Science, Southwest University, Chongqing 400715, China. E-mail: chengzhi@swu.edu.cn, Tel: (+86) 23 68254659, Fax: (+86) 23 68367257.*

<sup>b</sup> *Chongqing Key Laboratory of Biomedical Analysis (Southwest University), Chongqing Science & Technology Commission, College of Chemistry and Chemical Engineering, Southwest University, Chongqing 400715, China.*

<sup>c</sup> *State Key Laboratory of Chemo/Biosensing and Chemometrics, Hunan University, Changsha 410082, China*

## Figures

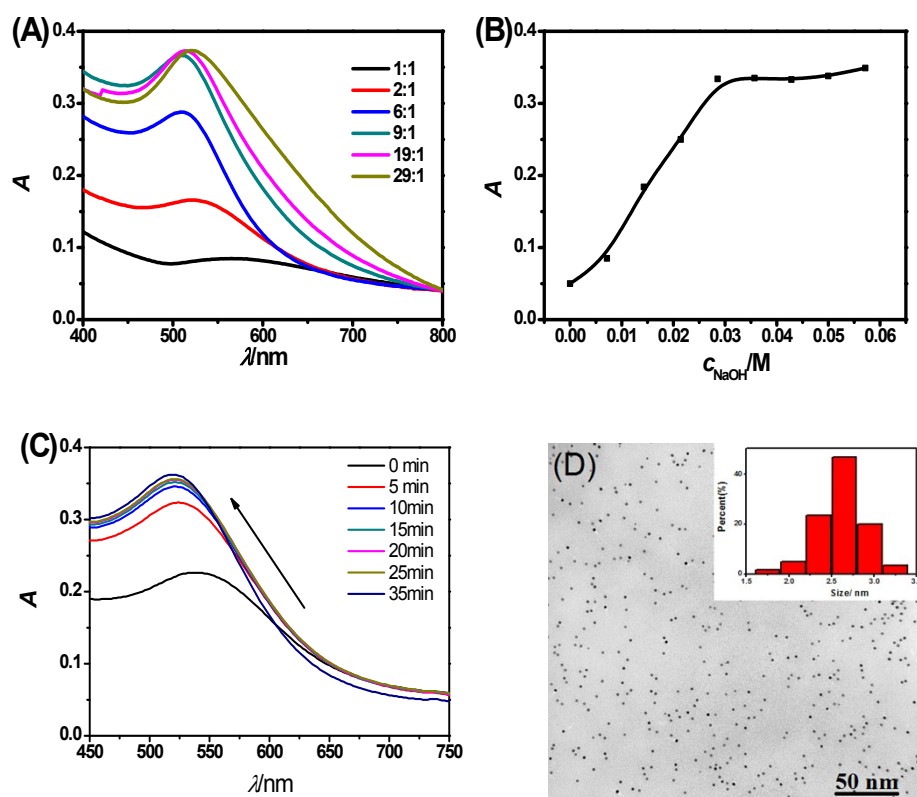

**Fig. S1** The conditions for the synthesis of AuNPs. (A) The effect of kiwi juice and HAuCl<sub>4</sub> concentrations on the synthesis of AuNPs.  $c_{\text{NaOH}}$ , 0.04 M; The volume fraction of kiwi juice were 41.6%, 55.6%, 71.4%, 75.0%, 79.2%, 80.6%, and 2.0 mM HAuCl<sub>4</sub> were 41.6%, 27.8%, 11.9%, 8.3%, 4.2%, 2.8%, respectively. (B) The effect of NaOH concentration on the synthesis of AuNPs. Volume ratio of 2.0 mM M HAuCl<sub>4</sub> and as-obtained kiwi juice was 19:1. (C) The effect of reaction time on the synthesis of AuNPs.  $c_{\text{NaOH}}$ , 0.04 M; volume ratio of 2.0 mM M HAuCl<sub>4</sub> and as-obtained kiwi juice was 19:1. (D) The size distribution of AuNPs.

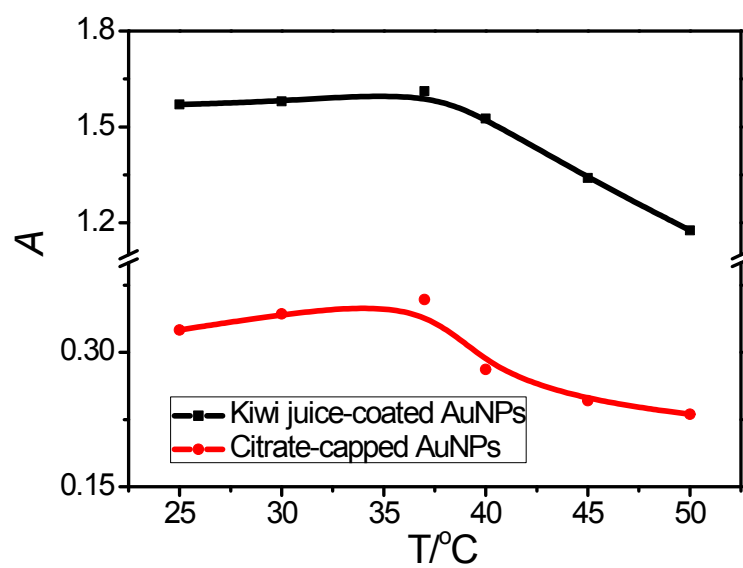

**Fig. S2** The effect of temperature on the catalytic activity of AuNPs. Conditions: TMB, 0.125 mM; AuNPs, 0.4 nM; pH 4.0; H<sub>2</sub>O<sub>2</sub>, 0.15 M; t, 30 min.

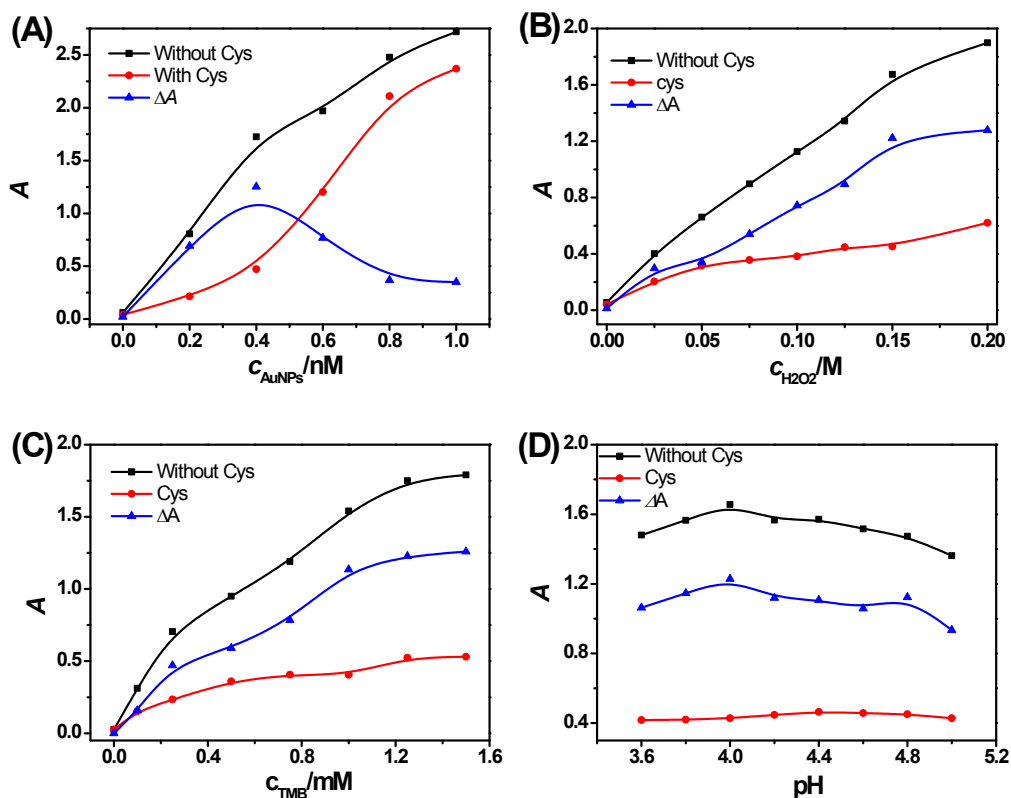

**Fig. S3** The dependence of AuNPs on catalytic activity. (A) AuNPs concentration. Conditions: TMB, 1.25 mM; H<sub>2</sub>O<sub>2</sub>, 0.15M; pH 4.0; cys,  $1.0 \times 10^{-6}$  M. (B) H<sub>2</sub>O<sub>2</sub> concentration. Conditions: AuNPs, 0.4 nM; TMB, 1.25 mM; pH 4.0; cys,  $1.0 \times 10^{-6}$  M. (C) Concentration of TMB. Conditions: AuNPs, 0.4 nM; H<sub>2</sub>O<sub>2</sub>, 0.15 M; pH 4.0; cys,  $1.0 \times 10^{-6}$  M; (D) pH. TMB, 0.125 mM; H<sub>2</sub>O<sub>2</sub>, 0.15M; AuNPs, 0.4 nM; pH 4.0; cys,  $1.0 \times 10^{-6}$  M.

**Table S1** The comparison of colorimetric assays for cysteine sensing

| Probes                                         | Color transition        | Concentration           | LOD               | Ref.     |
|------------------------------------------------|-------------------------|-------------------------|-------------------|----------|
| Nickel oxide nanoflowers                       | Blue-to-colorless       | 20-100 $\mu\text{M}$    | 1.1 $\mu\text{M}$ | 1        |
| $\text{Fe}_3\text{O}_4$ magnetic nanoparticles | Blue-to-colorless       | 6-50 $\mu\text{M}$      | 6 $\mu\text{M}$   | 2        |
| PtNPs/GO nanocomposites                        | Blue-to-colorless       | 25-5000 nM              | 1.2 nM            | 3        |
| ssDNA-stabilized AuNPs                         | Red to blue             | 0.1-5 $\mu\text{M}$     | 0.1 $\mu\text{M}$ | 4        |
| Fluorosurfactant-capped AgNPs                  | Red to blue             | 1.0-4.5 $\mu\text{M}$   | 0.8 $\mu\text{M}$ | 5        |
| Silver nanoprisms                              | Blue to red             | 0.16-1.65 $\mu\text{M}$ | 160 nM            | 6        |
| CuO/ZnO nanocomposites                         | Light blue to dark grey | 40-96 $\mu\text{M}$     | 40 $\mu\text{M}$  | 7        |
| Kiwi juice capped-AuNPs                        | Blue-to-colorless       | 50-1000 nM              | 6.2 nM            | Our work |

**References:**

- 1 C. Ray, S. Dutta, S. Sarkar, R. Sahoo, A. Roy and T. Pal, *J. Mater. Chem. B*, 2014, **2**, 6097-6105.
- 2 X. Q. Wu, Y. Xu, Y. L. Chen, H. Zhao, H. J. Cui, J. S. Shen and H. W. Zhang, *RSC Adv.*, 2014, **4**, 64438-64442.
- 3 X. Q. Lin, H. H. Deng, G. W. Wu, H. P. Peng, A. L. Liu, X. H. Lin, X. H. Xia and W. Chen, *Analyst*, 2015, **140**, 5251-5256.
- 4 Z. Chen, S. L. Luo, C. B. Liu and Q. Y. Cai, *Anal. Bioanal. Chem.*, 2009, **395**, 489-494.
- 5 C. Lu and Y. B. Zu, *Chem. Commun.*, 2007, 3871-3873.
- 6 T. Wu, Y. F. Li and C. Z. Huang, *Chinese Chem. Lett.*, 2009, **20**, 611-614.
- 7 M. Simsikova, J. Cechal, A. Zorkovska, M. Antalík and T. Sikola, *Colloid. Surface. B*, 2014, **123**, 951-958.
